# Supplementary material
Source: PubMed Central journal article supplement (PMC6014605)
Supplement: NIHMS76387-supplement-Ethical_Approval.pdf [file NIHMS76387-supplement-Ethical_Approval.pdf]

19 July 2017

Alan McCrorie  
5<sup>th</sup> Year Medical Student  
QUB

**Ref: 17.27v3**

**Title: Trial of Infographics in Northern Ireland (TINI): exploration of the effectiveness of icon array visualisations with text based cancer statistics information**

Thank you for the amendments submitted to the Ethics Committee, School of Medicine, Dentistry & Biomedical Sciences.

The committee confirm that they are happy to give approval for this project from 19 July 2017. This ethical approval and indemnity for the project by the University is dependent on the project being registered on the QUB Human Subject projects Database. Any future changes to any part of the submitted protocol must be forwarded to the committee prior to these changes taking place. The protocol held by the School Ethics Committee must be identical to the project/protocol taking place. We also ask you to remember that if applicable Governance and appropriate Sponsorship should also be in place before this project begins.

Thank you for sending this application to the School Committee.

Yours sincerely



Dr I Cooke  
Chair, Joint Research Ethics Committee

CC Dr Kieran McGlade
